# Supplementary material for: Predicting collapse of adaptive networked systems without knowing the network
Source: Sci Rep. 2020 Jan 27;10:1223. doi: 10.1038/s41598-020-57751-y (PMC6985233; doi:10.1038/s41598-020-57751-y)
Supplement: Supplementary file 1 — Supplementary information. [file 41598_2020_57751_MOESM1_ESM.pdf]

# Supplementary information: Predicting collapse of adaptive networked systems without knowing the network

Leonhard Horstmeyer<sup>1,2,+</sup>, Tuan Minh Pham<sup>1,2,+</sup>, Jan Korbel<sup>1,2,+</sup>, and Stefan Thurner<sup>1,2,3,4,+,\*</sup>

<sup>1</sup>Section for the Science of Complex Systems, CeMSIIS, Medical University of Vienna, Spitalgasse 23, A-1090, Vienna, Austria

<sup>2</sup>Complexity Science Hub Vienna, Josefstädterstrasse 39, A-1080 Vienna, Austria

<sup>3</sup>Santa Fe Institute, 1399 Hyde Park Road, Santa Fe, NM 87501, USA

<sup>4</sup>IIASA, Schlossplatz 1, 2361 Laxenburg, Austria

\*To whom correspondence should be addressed. E-mail: stefan.thurner@meduniwien.ac.at

+these authors contributed equally to this work

## ABSTRACT

### Proof of Eigenvector Quantization Theorem

**Theorem 1** (Eigenvector Quantization). *Let  $M$  be a binary matrix with entries  $M_{ij} \in \{0, 1\}$  and diagonal entries  $M_{ii} = 0$  for all  $i \in \{1, \dots, N\}$ . Let  $G$  be the directed network with directed adjacency matrix  $M$ . Let  $X(t) = (X_1(t), \dots, X_N(t))$  be an  $N$ -dimensional state vector, whose components  $X_i(t)$  evolve according to Eq. (1) from the main text. For all initial conditions  $X(0)$ , except for a set of Lebesgue-measure zero, the normalised vector  $x(t)$ , defined component-wise as  $x_i(t) = X_i(t) / \sum_j X_j(t)$ , converges to a stable fixed point  $x := \lim_{t \rightarrow \infty} x(t)$ , for which the following holds:*

**Eigenvector Quantization:** *Suppose  $G$  contains only one single cycle. Then any component  $x_i$  can be expressed as*

$$x_i = n_i x_{\min}, \quad (1)$$

where  $x_{\min}$  is the minimal non-zero component and  $n_i$  is a natural number. The value of  $x_{\min}$  is taken by the cycle-nodes, and the integer  $n_i \geq 0$  is the number of directed paths that lead from cycle-nodes to node  $i$ . If there are no paths from cycle nodes, then  $x_i = 0$ .

*Proof.* Here we state some preliminary facts and definitions that allow us to outline and state the proof. First we define for each pair of nodes  $i$  and  $j$  of the graph  $G$  the quantity  $\delta(i, j)$ , which measures the length of the longest directed path from  $i$  to  $j$ . Furthermore we recall the eigenvalue equation for  $M$

$$Mv = \lambda v$$

and denote by  $\lambda_1$  the eigenvalue with the largest real part. The Perron–Frobenius theory states that  $\lambda_1 = \rho(M) \geq 0$ , where  $\rho(M) \in \mathbb{R}$  is the real-valued spectral radius of  $M$ , and furthermore that  $\lambda_1 = 0$  if and only if  $G$  contains no cycles<sup>1</sup>. Regarding the outline of the proof, we first show a Lemma proving the convergence of Eq. (1) from the main text to the Perron-Frobenius eigenvector by considering the cases  $\lambda_1 = 0$  and  $\lambda_1 > 0$  separately. Then we prove the eigenvector quantization.

**Lemma 1.** *For all initial conditions  $X(0)$ , except for a set of Lebesgue-measure zero, the normalised vector  $x(t)$ , defined component-wise as  $x_i(t) = X_i(t) / \sum_j X_j(t)$ , converges to a stable fixed point  $x := \lim_{t \rightarrow \infty} x(t)$  which satisfies  $Mx = \lambda x$ .*

*Proof of Lemma:* **Case  $\lambda_1 = 0$ .** We will show that for almost all initial conditions the relative state vector  $x(t)$  converges to a stable fixed point, which is a non-negative eigenvector of  $M$ . Let's denote  $J := \{j | M_{jk} = 0 \forall k\}$  as the set of nodes without

incoming links. Provided that  $X_j(0) > 0$  holds for all  $j \in J$ , then we can show by induction that

$$X_k^{(n)}(t) = \frac{t^n}{n!} \sum_{j: \delta(j,k)=n} X_j^{(0)}(0) + \mathcal{O}(t^{n-1}) \quad , \quad (2)$$

where the superscript in  $X_k^{(n)}$  indicates that the node  $k$  is at a  $\delta$ -distance  $n$  from the set  $J$ , so that  $\delta(J, k) = n$ . First, (2) holds for  $n = 0$ , because  $dX_j^{(0)}(t)/dt = 0$  for any  $j \in J$ . Now, suppose that (2) holds for some  $n$ . We will show that it also holds for  $n + 1$ . Integrating

$$\frac{d}{dt} X_\ell^{(n+1)} = \sum_{j: \delta(j,\ell)=1} X_j^{(n)}(t) \quad ,$$

and plugging equation (2) into it yields the desired result. This completes the proof by induction. Let  $n_{\max} = \max_{j,k} \delta(j, k)$  be the length the longest directed path in the network and denote  $k_{\max}$  those nodes at the ends of those paths. Then following (2)

the states of the nodes  $k_{\max}$  are of the order  $\mathcal{O}(t^{n_{\max}})$ . Upon normalization, the relative state vector reads  $x_k(t) \simeq \frac{X_k^{(n)}}{\mathcal{O}(t^{n_{\max}})} \simeq$

$\frac{\mathcal{O}(t^n)}{\mathcal{O}(t^{n_{\max}})} = \mathcal{O}(t^{n-n_{\max}})$ , which vanishes as  $t \rightarrow \infty$  for any node  $k \neq k_{\max}$ . It can also be seen that any  $x$ , whose components vanish everywhere except on  $k_{\max}$ , where they assume non-negative values, are eigenvectors of  $M$  with eigenvalue  $\lambda_1 = 0$ , because  $M_{jk_{\max}} x_{k_{\max}} = 0$  by definition of  $k_{\max}$  having no outgoing links.

**Case  $\lambda_1 > 0$ .**

We consider the eigenspace  $V$  of  $\lambda_1$ . By considering the Frobenius normal form of the matrix  $M$  and applying By the Perron-Frobenius theorem to all its irreducible factors we know that the components of the eigenvectors of  $\lambda_1$  are all non-negative reals. Hence the eigenspace is a subspace of  $\mathbb{R}^N$  and we define  $V := \{v \in \mathbb{R}^N \mid Mv = \lambda_1 v\}$  and its orthogonal complement  $W = V^\perp$  with respect to the Euclidean inner product  $\langle \cdot, \cdot \rangle$ . We pick an orthonormal basis  $\{v^\alpha\}$  of  $V$  and a basis  $\{w^\beta\}$  of  $W$ , which together form an orthonormal basis of  $\mathbb{R}^N = V \oplus W$ . Let us now consider an arbitrary solution  $X(t)$  of Eq. (1), decomposed in that basis

$$X(t) = \sum_{\alpha} a_{\alpha}(t) v^{\alpha} + \sum_{\beta} b_{\beta}(t) w^{\beta} \quad . \quad (3)$$

We plug this decomposition into (??) and take the inner product with respect to the basis vectors  $v^{\alpha} \in V$  and  $w^{\beta} \in W$ . Then we use the eigenvalue equation for  $\lambda_1$  and the orthogonality  $\langle v^{\alpha}, w^{\beta} \rangle = 0$  to obtain dynamical equations for the components  $a_{\alpha}$  and  $b_{\beta}$

$$\begin{aligned} \frac{d}{dt} a_{\alpha}(t) &= \lambda_1 a_{\alpha}(t) + \sum_{\beta} b_{\beta}(t) \langle v^{\alpha}, M w^{\beta} \rangle \\ \frac{d}{dt} b_{\beta}(t) &= \sum_{\beta'} \langle w^{\beta}, M w^{\beta'} \rangle b_{\beta'}(t) \quad . \end{aligned} \quad (4)$$

By defining the matrices  $B$  with components  $B_{\beta\beta'} = \langle w^{\beta}, M w^{\beta'} \rangle$  and  $C$  with components  $C_{\alpha\beta} = \langle v^{\alpha}, M w^{\beta} \rangle$  we can write the formal solution of the ODE:

$$a(t) = e^{\lambda_1 t} a(0) + e^{\lambda_1 t} \int_0^t ds e^{-\lambda_1 s} C e^{Bs} b(0) \quad (5)$$

$$b(t) = e^{Bt} b(0) \quad , \quad (6)$$

where  $a(t)$  and  $b(t)$  are the vectors with components  $a_{\alpha}(t)$  and  $b_{\beta}(t)$  respectively. First, we note from (5) and (6) that in any norm  $\|a(t)\| \geq e^{\lambda_1 t} \|a(0)\|$ , by the triangle inequality. Let us for the rest of the argument consider only vectors  $X(0)$  with  $\|a(0)\| > 0$ . Then it holds in any norm that  $\|b(t)\|/\|a(t)\| \leq \|e^{(B-\lambda_1)t} b(0)\|/\|a(0)\| \rightarrow 0$  as  $t \rightarrow \infty$ . For the 2-norm  $\|\cdot\|_2$  it also holds that  $\|X(t)\|_2^2 = \langle X(t), X(t) \rangle = \|a(t)\|_2^2 + \|b(t)\|_2^2$  and therefore

$$\frac{\|b(t)\|_2^2}{\|X(t)\|_2^2} = \frac{\|b(t)\|_2^2}{\|a(t)\|_2^2} \left( 1 + \frac{\|b(t)\|_2^2}{\|a(t)\|_2^2} \right)^{-1} \xrightarrow{t \rightarrow \infty} 0 \quad . \quad (7)$$

Then we consider  $x_i(t) = X_i(t)/\|X(t)\|_1$  from (3). We note that the 2-norm and the 1-norm are equivalent, which means that there exist constants  $\eta$  and  $\xi \geq \eta$ , such that  $\eta\|u\|_2 \leq \|u\|_1 \leq \xi\|u\|_2$  for any  $u$  in a finite dimensional space  $\mathbb{R}^N$ . Now, one may see from

$$\langle w^\beta, x_i(t) \rangle^2 = \frac{b_\beta^2(t)}{\|X(t)\|_1^2} \leq \frac{\|b(t)\|_2^2}{\|X(t)\|_1^2} \leq \frac{1}{\eta^2} \frac{\|b(t)\|_2^2}{\|X(t)\|_2^2} \xrightarrow{t \rightarrow \infty} 0,$$

that those components of the limiting vector  $x_i$  that are orthogonal to the eigenspace  $V$  vanish, precisely because  $\langle w^\beta, x_i \rangle = \lim_{t \rightarrow \infty} \langle w^\beta, x_i(t) \rangle = 0$  for all  $w^\beta \in W$ .

We conclude that within the set of initial conditions  $\Delta^{N-1} = \{x \in \mathbb{R}^N : \|x\|_1 = 1 \text{ \& } x_i \geq 0 \forall i\}$  there is a set of initial vectors  $\mathcal{S}_0 = \{x_0 \in \Delta^{N-1} : \langle V, x_0 \rangle \neq 0\}$  whose limiting vectors  $x$  have been shown to possess non-vanishing components only in the direction of  $V$  and no components in the direction of  $W$ , that is they belongs to the set  $\Omega = \{x \in \Delta^{N-1} : \langle W, x_0 \rangle = 0\}$ . First of all  $\mathcal{S}_0$  has full Lebesgue measure within  $\Delta^{N-1}$ . Secondly,  $\Omega$  is closed in  $\mathcal{S}_0$ , because  $V$  is closed in  $\mathbb{R}^N$  (if it is a proper subspace, otherwise the lemma is trivial) and therefore  $\Omega = V \cap \Delta^{N-1}$  is closed in  $\mathcal{S}_0 = W^c \cap \Delta^{N-1}$ , where  $W^c$  is the set-complement of  $W$  in  $\mathbb{R}^N$ . So points within some  $\varepsilon$  environment of the limiting set  $\Omega$  converge to  $\Omega$ , making it a stable limiting set and more precisely a set of stable limiting points. Lastly, all those limiting vectors  $x$  in  $V$  satisfy by definition the eigenvalue equation  $Mx = \lambda x$   $\square$

**Eigenvector quantization:** Let us now prove the main theorem. Let  $x$  be the unique eigenvector of  $M$  (Perron–Frobenius eigenvector) corresponding to  $\lambda_1 = 1$  when there is only one cycle  $\mathcal{C}$  in  $G$ . As  $\mathcal{C}$  is the unique strongly connected component of  $G$ , only those nodes  $k$ , which are either in  $\mathcal{C}$  or in the out-component  $\mathcal{C}_{\text{out}}$  of  $\mathcal{C}$ , have  $x_k > 0$ <sup>2</sup>. Consider an arbitrary node  $c \in \mathcal{C}$ . Since there is no contribution to  $x_c$  from any of its upstream neighbours  $s$  that are in the in-component of  $\mathcal{C}$  (as  $x_s = 0$ ) and there is only one in-link from another  $c' \in \mathcal{C}$  to  $c$ ,  $x_c = M_{cc'}x_{c'} = x_{c'}$ .

Now let  $\delta_i$  denote the maximal length of simple directed paths  $\mathcal{P}_c$  from a cycle node  $c$  to a node  $i \in \mathcal{C}_{\text{out}}$ . One can show that

$$x_i = \sum_{\mathcal{P}_c} (M^{\delta_i})_{ic} x_c = n_i x_c \quad . \quad (8)$$

where  $n_i = \sum_{\mathcal{P}_c} (M^{\delta_i})_{ic}$ , by induction on the length levels, denoted by  $\delta$ .

**Step 0:** For  $\delta = 0$ . Consider those nodes  $i$  with  $\delta_i = \delta = 0$ . These are precisely the cycle-nodes, which are at a distance 0 from the cycle. We have already shown  $x_c = M^0 x_{c'}$  and  $n_c = 1$  above.

**Induction Step:** Suppose (8) holds for all nodes  $i$  that have  $\delta_i \leq \delta$  for some  $\delta > 0$ . For all nodes  $j$  with  $\delta_j = \delta + 1$ , we have

$$x_j = \sum_i M_{ji} x_i = \sum_{i: \delta_i = \delta} M_{ji} \sum_{\mathcal{P}_c} (M^{\delta_i})_{ic} x_c = n_j x_c,$$

where  $n_j = \sum_{\mathcal{P}'_c} (M^{\delta_i+1})_{jc}$  and  $\mathcal{P}'_c$  denotes such directed paths from  $c$  to  $j$  that are the concatenation of  $\mathcal{P}_c$  with the directed edge from  $i$  to  $j$ . The relation (8) thus is proved.

Finally, as  $(M^r)_{ic}$  yields the number of directed path of length  $r$  from any  $c$  to  $i$ <sup>1</sup>. Thus, by its definition,  $n_i$  equals to the number of directed paths that lead from those cycle-nodes to the node  $i$ . This together with the fact that  $x_{\min} = x_c$ , as  $n_c = 1$ ,  $\forall c \in \mathcal{C}$  completes the proof of the eigenvector quantization.  $\square$

Now we consider some extensions to the theorem.

## Jain–Krishna model

### **Proof that the collapse is preceded by a single cycle regime**

Let us define a *collapse-keystone* as a node that belongs to all the cycle(s) in  $G$ . Then we have the following result:

**Proposition 1.** *Let  $v$  be a collapse-keystone node of a finite irreducible graph  $G$  with the adjacency matrix  $A$ , then either the largest eigenvalue  $\lambda_1$  of  $G$  is equal to 1 or  $v$  is not the least populated node.*

This result is easily extended to general graphs by considering their decomposition into irreducible components via the Frobenius normal form. Let  $v$  be a collapse-keystone of a general graph  $G$ . The largest eigenvalue  $\lambda_1$  of  $G$  equals the largest eigenvalue of all of its irreducible components. Since  $v$  must be part of all cycles, it is certainly inside this irreducible component and we conclude by Proposition 1 that either  $\lambda_1 = 1$  for that component, and thus for the entire graph, or  $v$  is not the least populated node of that component and thus not of the entire graph either.

*Proof.* We prove this statement by showing its contraposition holds: *Suppose  $\lambda_1 > 1$  and  $v$  is the least populated node, then there exists at least one cycle in  $G$  that does not contain  $v$ , i.e.,  $v$  is not a collapse-keystone.*

Let  $\mathcal{D}(v) := \{w \in \mathcal{V} : A_{wv} = 1\}$  be the set of downstream neighbours of  $v$ . Since  $v$  is the weakest,  $x_w > x_v$  for all  $w \in \mathcal{D}(v)$ . Furthermore, from  $\lambda_1 x_w = \sum_{s \neq v} A_{ws} x_s + x_v > \lambda_1 x_v$ , we have  $\sum_{s \neq v} A_{ws} x_s > (\lambda_1 - 1)x_v > 0$ . This means that each node  $w \in \mathcal{D}(v)$  has at least one in-link that does not come directly from  $v$ , that is  $\forall w \in \mathcal{D}(v), \exists s \neq v : A_{ws} = 1$ .

Since there is no cycle that does not contain  $v$ , any in-link  $A_{ws}$  to  $w \in \mathcal{D}(v)$  must be downstream from  $v$  through another node  $w' \in \mathcal{D}(v)$ . Therefore, consider the subgraph  $G(\mathcal{D}(v))$  of  $G$  which is constructed as follow: in  $G(\mathcal{D}(v))$  a directed link  $w_2 \rightarrow w_1$  is put if there exists a path from  $w_2$  to  $w_1$ . By its construction,  $G(\mathcal{D}(v))$  is an irreducible graph with at least  $|\mathcal{D}(v)|$  directed links over  $|\mathcal{D}(v)|$  nodes, hence  $G(\mathcal{D}(v))$  must contain at least one cycle. This cycle corresponds to a closed directed path that does not contain  $v$ , so  $v$  is not a collapse-keystone.  $\square$

## Other precursors

Here we mention some other precursors that are typically used in time-series analysis:

**Spectral radius of the correlation matrix.** Let us consider a multivariate correlation coefficient matrix with some lag  $k$ :

$$CC_{ij}(k) = \sum_t \frac{(x_i(t) - \mu_i)(x_j(t-k) - \mu_j)}{\sigma_i(t)\sigma_j(t-k)}. \quad (9)$$

The spectral radius  $\lambda_C$  of the matrix  $CC(k)$  is considered as a precursor of a critical transition<sup>3</sup>.

**Spectral radius of volatility.** We define the volatility matrix as

$$\sigma_{ij}^2(k) = \sum_t (x_i(t) - \mu_i)(x_j(t-k) - \mu_j)$$

Again, the spectral radius  $\lambda_V$  of  $\sigma^2$  is considered as a precursor of a critical transition<sup>3</sup>.

## Expected Time-To-Collapse in the Jain–Krishna model

**Proposition 2.** *The average life time of the Jain–Krisna model in the critical phase is*

$$\langle T \rangle = \frac{e}{m}, \quad (10)$$

with variance

$$\text{Var}(T) = \frac{2e}{m} \left( \frac{e}{m} - 1 \right). \quad (11)$$

*Proof.* Suppose that at present the system is in the single-cycle phase; then a crash may happen at any next time step. The probability  $P^d(T)$  that the collapse happens at time  $T$  can be expressed as

$$P^d(T) = (1-p)^{T-1} p, \quad (12)$$

where  $p$  is the probability that a cycle-node is removed from the single-cycle. This equation implies that until  $T-1$  only those weakest nodes belonging to the periphery are removed, while one of the cycle-nodes is picked at  $T$ .

Let  $L$  denote the total number of the least fit species, those whose populations equal that of the cycle species. Since  $L$  consists of nodes having only one incoming link (otherwise they would not be the weakest), the chance by which a node of the graph belongs to the set  $L$  is

$$p_w = 1 - \left( 1 - \frac{m}{N-1} \right)^{N-1}. \quad (13)$$

For large sparse networks, we have  $p_w \simeq m$ . Further, among these  $L$  nodes, let  $L_c$  be the number of cycle-nodes, so  $L_c \leq L$ . If a node is randomly chosen from  $L$ , the chance that it is a cycle-node is

$$p_c = \frac{L_c}{L}. \quad (14)$$

One can estimate this fraction using a combinatorial argument established by Gerbner et al.<sup>4</sup>: the number  $n_L(k)$  of cycles of length  $k$  contained in a directed graph with  $L$  vertices  $G(L)$  is given by,  $n_L(k) \cong \left( \frac{L-1}{k-1} \right)^{k-1}$ . The function  $n_L(k)$  is strongly peaked at  $\hat{L}_c = \frac{L-1}{e} + 1$ , while it vanishes fast for any  $k \neq \hat{L}_c$ . Hence among all possible cycles of length  $k$  that can be formed in  $G(L)$ , the most likely one has length  $\hat{L}_c$ . Using  $\hat{L}_c$  to approximate  $L_c$  in (14), we obtain  $p_c \simeq 1/e$ . Finally, probability,  $p$ ,

now can be defined as  $p = p_c \cdot p_w = \frac{m}{e}$ , since this probability equals the probability  $m$ , that one of those weakest nodes is chosen for removal, times the probability  $1/e$ , that it comes from the cycle. Note that the approximation,  $p_w \simeq m$ , becomes worse for small values of  $N$ . For this case, one should use the exact expression (13). Substituting  $p = m/e$  in (12), we can calculate the expected time-to-collapse as  $\langle T \rangle = \sum_{T=1}^{\infty} T P^d(T) = \sum_{T=1}^{\infty} T \left(1 - \frac{m}{e}\right)^{T-1} \frac{m}{e} = \frac{e}{m}$ . An analog computation yields  $\left\langle (T - \langle T \rangle)^2 \right\rangle = \frac{2e}{m} \left(\frac{e}{m} - 1\right)$ .  $\square$

## References

1. Cvetković, D., Doob, M. & Sachs, H. Spectra of graphs: theory and application. Pure and applied mathematics (Academic Press, 1980).
2. Newman, M. Networks: An Introduction (OUP Oxford, 2010).
3. Scheffer, M. et al. Early-warning signals for critical transitions. Nature **461** 7260, 53–9, DOI: [10.1038/nature08227](https://doi.org/10.1038/nature08227) (2009).
4. Gerbner, D., Keszegh, B., Palmer, C. & Patkos, B. On the number of cycles in a graph with restricted cycle lengths. SIAM J. on Discret. Math. **32**, 266–279, DOI: [10.1137/16M109898X](https://doi.org/10.1137/16M109898X) (2018). <https://doi.org/10.1137/16M109898X>.
